# Supplementary material for: Longitudinal Analysis of Antibody Responses to the mRNA BNT162b2 Vaccine in Patients Undergoing Maintenance Hemodialysis: A 6-Month Follow-Up
Source: PubMed Central journal article supplement (PMC8740691; doi:10.3389/fmed.2021.796676), 2021-12-24
Supplement: Presentation_1.pdf [file Presentation_1.pdf]

**Supplementary References**

software for data management, graphical design and statistical analysis

- R, version 4.0.4 GUI 1.74

(R Core Team (2021). *R: A language and environment for statistical computing*. R Foundation for Statistical Computing, Vienna, Austria. URL <https://www.R-project.org/>.)

- RStudio, version 1.1.463

(RStudio Team (2020). *RStudio: Integrated Development for R*. RStudio, PBC, Boston, MA URL <http://www.rstudio.com/>.),

R packages

- Tidyverse

(Wickham et al., (2019). *Welcome to the tidyverse*. *Journal of Open Source Software*, 4(43), 1686, <https://doi.org/10.21105/joss.01686>

- ggplot2

H. Wickham. *ggplot2: Elegant Graphics for Data Analysis*. Springer-Verlag New York, 2016.

- openxlsx

Philipp Schaubberger and Alexander Walker (2020). *openxlsx: Read, Write and Edit xlsx Files*. R package version 4.2.3. <https://CRAN.R-project.org/package=openxlsx>

- writexl

Jeroen Ooms (2020). *writexl: Export Data Frames to Excel' xlsx' Format*. R package version 1.3.1. <https://CRAN.R-project.org/package=writexl>

- officer

David Gohel (2021). *officer: Manipulation of Microsoft Word and PowerPoint Documents*. R package version 0.4.0. <https://CRAN.R-project.org/package=officer>

- rvg

David Gohel (2020). *rvg: R Graphics Devices for Vector Graphics Output*. R package version 0.2.5. <https://CRAN.R-project.org/package=rvg>

- ggpubr

Alboukadel Kassambara (2020). *ggpubr: 'ggplot2' Based Publication Ready Plots*. R package version 0.4.0. <https://CRAN.R-project.org/package=ggpubr>
