# Supplementary material for: Longitudinal Analysis of Antibody Responses to the mRNA BNT162b2 Vaccine in Patients Undergoing Maintenance Hemodialysis: A 6-Month Follow-Up
Source: PubMed Central journal article supplement (PMC8740691; doi:10.3389/fmed.2021.796676), 2021-12-24
Supplement: Table_1.pdf [file Table_1.pdf]

**Supplementary Table 1.** Comparison of anti-Spike IgG, IgM, and IgA positivity at t1 vs t2 (data presented in Figure 2).

|          |          | Positivity; n (%; 95% CI) |     |                      |                       |                        |
|----------|----------|---------------------------|-----|----------------------|-----------------------|------------------------|
|          | Isotype  | Age                       | n   | t1                   | t2                    | p-value*               |
| Patients |          | All                       | 143 | 42 (29.4; 22.5-37.3) | 130 (90.9; 85.1-94.6) | 8.01x10 <sup>-26</sup> |
|          | IgG      | 27-70                     | 66  | 22 (33.3; 23.2-45.3) | 63 (95.5; 87.5-98.4)  | 1.19x10 <sup>-12</sup> |
|          |          | 71-93                     | 77  | 20 (26.0; 17.5-36.7) | 67 (87.0; 77.7-92.8)  | 7.61x10 <sup>-14</sup> |
|          | IgM      | All                       | 143 | 17 (11.9; 7.6-18.2)  | 42 (29.4; 22.5-37.3)  | 0.0005                 |
|          | IgA      | All                       | 143 | 59 (41.3; 33.5-49.5) | 120 (83.9; 77.0-89.0) | 2.27x10 <sup>-13</sup> |
|          | Controls |                           | All | 143                  | 71 (49.7; 41.6-57.7)  | 136 (95.1; 90.2-97.6)  |
| IgG      |          | 30-70                     | 66  | 48 (72.7; 61.0-82.0) | 65 (98.5; 91.9-99.7)  | 7.27x10 <sup>-05</sup> |
|          |          | 71-96                     | 77  | 23 (29.9; 20.8-40.8) | 71 (92.2; 84.0-96.4)  | 8.08x10 <sup>-15</sup> |
| IgM      |          | All                       | 143 | 22 (15.4; 10.4-22.2) | 36 (25.2; 18.8-32.9)  | 0.0559                 |
| IgA      |          | All                       | 143 | 72 (50.4; 42.2-58.4) | 113 (79.0; 71.6-84.9) | 7.47x10 <sup>-07</sup> |

n, number of individuals with a given event; %, percentage; CI, confidence interval; t1 – sera collected 21 days post-1<sup>st</sup> vaccine dose; t2 – sera collected 42 days post-1<sup>st</sup> vaccine dose.

\*Chi squared test with BH method for *p*-value adjustment used to compare positivity between t1 and t2.
