# Supplementary material for: Longitudinal Analysis of Antibody Responses to the mRNA BNT162b2 Vaccine in Patients Undergoing Maintenance Hemodialysis: A 6-Month Follow-Up
Source: PubMed Central journal article supplement (PMC8740691; doi:10.3389/fmed.2021.796676), 2021-12-24
Supplement: Table_2.pdf [file Table_2.pdf]

**Supplementary Table 2.** Comparison of anti-Spike IgG, IgM, and IgA positivity at in patients and controls, according to time-point (data presented in Figure 2).

| Isotype | <i>p</i> -value* |        |
|---------|------------------|--------|
|         | t1               | t2     |
| IgG     | 0.0014           | 0.2463 |
| IgM     | 0.5068           | 0.5068 |
| IgA     | 0.3088           | 0.3612 |

t1 – sera collected 21 days post-1<sup>st</sup> vaccine dose; t2 – sera collected 42 days post-1<sup>st</sup> vaccine dose.

\*Chi squared test with BH method for *p*-value adjustment used to compare positivity between patients and controls.
