# Supplementary material for: Longitudinal Analysis of Antibody Responses to the mRNA BNT162b2 Vaccine in Patients Undergoing Maintenance Hemodialysis: A 6-Month Follow-Up
Source: PubMed Central journal article supplement (PMC8740691; doi:10.3389/fmed.2021.796676), 2021-12-24
Supplement: Table_3.pdf [file Table_3.pdf]

**Supplementary Table 3.** IgG, IgM, and IgA levels at t0, t1, and t2, according to age groups (data presented in Figure 3).

|          | Isotype | Age   | n   | Median [IQR]     |                  |                  |
|----------|---------|-------|-----|------------------|------------------|------------------|
|          |         |       |     | t0               | t1               | t2               |
| Patients |         | All   | 143 | 0.22 [0.16-0.32] | 0.63 [0.32-1.08] | 2.05 [1.67-2.23] |
|          | IgG     | 27-70 | 66  | 0.22 [0.15-0.32] | 0.68 [0.45-1.21] | 2.11 [1.87-2.28] |
|          |         | 71-93 | 77  | 0.22 [0.17-0.30] | 0.47 [0.28-1.00] | 1.87 [1.57-2.18] |
|          | IgM     | 27-93 | 143 | 0.33 [0.24-0.56] | 0.49 [0.32-0.75] | 0.66 [0.45-1.07] |
|          | IgA     | 27-93 | 143 | 0.53 [0.35-0.73] | 0.85 [0.63-1.10] | 1.22 [1.10-1.63] |
| Controls |         | All   | 143 | 0.19 [0.15-0.24] | 0.96 [0.46-1.39] | 1.82 [1.70-1.90] |
|          | IgG     | 30-70 | 66  | 0.17 [0.14-0.21] | 1.27 [0.93-1.49] | 1.81 [1.72-1.89] |
|          |         | 71-96 | 77  | 0.21 [0.16-0.26] | 0.52 [0.38-1.21] | 1.83 [1.66-1.92] |
|          | IgM     | 30-96 | 143 | 0.49 [0.34-0.66] | 0.49 [0.35-0.75] | 0.56 [0.35-1.01] |
|          | IgA     | 30-96 | 143 | 0.56 [0.38-0.80] | 1.00 [0.69-1.16] | 1.15 [1.04-1.35] |

n, number of individuals with a given event; IQR, interquartile range; t0 – sera collected on day of 1<sup>st</sup> vaccine dose; t1 – sera collected 21 days post-1<sup>st</sup> vaccine dose; t2 – sera collected 42 days post-1<sup>st</sup> vaccine dose.
