# Supplementary material for: Longitudinal Analysis of Antibody Responses to the mRNA BNT162b2 Vaccine in Patients Undergoing Maintenance Hemodialysis: A 6-Month Follow-Up
Source: PubMed Central journal article supplement (PMC8740691; doi:10.3389/fmed.2021.796676), 2021-12-24
Supplement: Table_4.pdf [file Table_4.pdf]

**Supplementary Table 4.** Comparison of IgG, IgM, and IgA levels at t0, t1, and t2 between HD patients and controls, in individuals above and below 70 years (data presented in Figure 3).

| Isotype | Age    | <i>p</i> -value*       |                        |                        |
|---------|--------|------------------------|------------------------|------------------------|
|         |        | t0                     | t1                     | t2                     |
| IgG     | All    | 0.0103                 | 4.98x10 <sup>-04</sup> | 5.37x10 <sup>-06</sup> |
|         | 27-70y | 0.0170                 | 2.01x10 <sup>-05</sup> | 5.72x10 <sup>-09</sup> |
|         | 71-96y | 0.2941                 | 0.2492                 | 0.2492                 |
| IgM     | All    | 1.75x10 <sup>-05</sup> | 0.3917                 | 0.0913                 |
|         | 27-70y | 0.0336                 | 0.0161                 | 0.7138                 |
|         | 71-96y | 0.0003                 | 0.3009                 | 0.0074                 |
| IgA     | All    | 3.30x10 <sup>-16</sup> | 0.5577                 | 3.30x10 <sup>-16</sup> |
|         | 27-70y | 0.4218                 | 0.0219                 | 0.0219                 |
|         | 71-96y | 0.1445                 | 0.9665                 | 0.2426                 |

t0 – sera collected on day of 1<sup>st</sup> vaccine dose; t1 – sera collected 21 days post-1<sup>st</sup> vaccine dose; t2 – sera collected 42 days post-1<sup>st</sup> vaccine dose.

\*Wilcoxon rank sum test with BH method for *p*-value adjustment was used to compare Ig levels between patients and controls.
