# Supplementary material for: Longitudinal Analysis of Antibody Responses to the mRNA BNT162b2 Vaccine in Patients Undergoing Maintenance Hemodialysis: A 6-Month Follow-Up
Source: PubMed Central journal article supplement (PMC8740691; doi:10.3389/fmed.2021.796676), 2021-12-24
Supplement: Table_5.pdf [file Table_5.pdf]

**Supplementary Table 5.** Comparison of IgG, IgM, and IgA levels in individuals above or below 70 years old in each time-point (data presented in Figure 3).

|          | Isotype | <i>p</i> -value*       |                        |                        |
|----------|---------|------------------------|------------------------|------------------------|
|          |         | t0                     | t1                     | t2                     |
| Patients | IgG     | 0.6403                 | 0.0503                 | 0.0115                 |
|          | IgM     | 0.0006                 | 0.0006                 | 0.0001                 |
|          | IgA     | 0.8318                 | 0.8318                 | 0.8318                 |
| Controls | IgG     | 0.0023                 | 5.09x10 <sup>-07</sup> | 0.8380                 |
|          | IgM     | 0.0016                 | 2.66x10 <sup>-13</sup> | 1.10x10 <sup>-10</sup> |
|          | IgA     | 9.73x10 <sup>-04</sup> | 5.28x10 <sup>-08</sup> | 6.60x10 <sup>-16</sup> |

t0 – sera collected on day of 1<sup>st</sup> vaccine dose; t1 – sera collected 21 days post-1<sup>st</sup> vaccine dose; t2 – sera collected 42 days post-1<sup>st</sup> vaccine dose.

\*Wilcoxon rank sum test with BH method for *p*-value adjustment was used to compare Ig levels between age groups.
