# Supplementary material for: Longitudinal Analysis of Antibody Responses to the mRNA BNT162b2 Vaccine in Patients Undergoing Maintenance Hemodialysis: A 6-Month Follow-Up
Source: PubMed Central journal article supplement (PMC8740691; doi:10.3389/fmed.2021.796676), 2021-12-24
Supplement: Table_6.pdf [file Table_6.pdf]

**Supplementary Table 6.** *p*-values comparing IgG, IgM, and IgA levels over time in HD patients and controls (data presented in Figure 3).

| <i>p</i> -value* |         |      | All                   |                       | 27-70y                |                       | 71-96y                 |                        |
|------------------|---------|------|-----------------------|-----------------------|-----------------------|-----------------------|------------------------|------------------------|
|                  | Isotype | Time | t0                    | t1                    | t0                    | t1                    | t0                     | t1                     |
| Patients         | IgG     | t1   | 2.2x10 <sup>-16</sup> | -                     | 6.2x10 <sup>-12</sup> | -                     | 2.7x10 <sup>-10</sup>  | -                      |
|                  |         | t2   | 2.2x10 <sup>-16</sup> | 2.2x10 <sup>-16</sup> | 2.0x10 <sup>-12</sup> | 2.0x10 <sup>-12</sup> | 5.5x10 <sup>-14</sup>  | 5.5x10 <sup>-14</sup>  |
| Controls         |         | t1   | 2.2x10 <sup>-16</sup> | -                     | 2.0x10 <sup>-12</sup> | -                     | 7.5 x10 <sup>-13</sup> | -                      |
|                  |         | t2   | 2.2x10 <sup>-16</sup> | 2.2x10 <sup>-16</sup> | 2.0x10 <sup>-12</sup> | 2.0x10 <sup>-12</sup> | 4.4 x10 <sup>-14</sup> | 4.4 x10 <sup>-14</sup> |
| Patients         | IgM     | t1   | 8.7x10 <sup>-13</sup> | -                     | 9.3x10 <sup>-6</sup>  | -                     | 1.9x10 <sup>-8</sup>   | -                      |
|                  |         | t2   | 2.2x10 <sup>-16</sup> | 4.5x10 <sup>-15</sup> | 7.1x10 <sup>-12</sup> | 1.7x10 <sup>-8</sup>  | 2.3x10 <sup>-11</sup>  | 8.8x10 <sup>-8</sup>   |
| Controls         |         | t1   | 0.0602                | -                     | 1.3x10 <sup>-8</sup>  | -                     | 0.0004                 | -                      |
|                  |         | t2   | 0.00005               | 0.0405                | 1.1x10 <sup>-8</sup>  | 0.07163               | 0.3502                 | 0.2372                 |
| Patients         | IgA     | t1   | 2.2x10 <sup>-16</sup> | -                     | 1.8x10 <sup>-11</sup> | -                     | 1.4x10 <sup>-12</sup>  | -                      |
|                  |         | t2   | 2.2x10 <sup>-16</sup> | 2.2x10 <sup>-16</sup> | 3.4x10 <sup>-12</sup> | 1.0x10 <sup>-10</sup> | 1.1x10 <sup>-13</sup>  | 7.8x10 <sup>-13</sup>  |
| Controls         |         | t1   | 3.3x10 <sup>-16</sup> | -                     | 3.2x10 <sup>-12</sup> | -                     | 3.2x10 <sup>-6</sup>   | -                      |
|                  |         | t2   | 3.3x10 <sup>-16</sup> | 2.3x10 <sup>-11</sup> | 3.2x10 <sup>-12</sup> | 0.0181                | 1.3x10 <sup>-12</sup>  | 5.4x10 <sup>-10</sup>  |

t0 – sera collected on day of 1<sup>st</sup> vaccine dose; t1 – sera collected 21 days post-1<sup>st</sup> vaccine dose.

\*Pairwise Wilcoxon signed-rank test was used to compare Ig levels between time points.
