# Supplementary material for: Longitudinal Analysis of Antibody Responses to the mRNA BNT162b2 Vaccine in Patients Undergoing Maintenance Hemodialysis: A 6-Month Follow-Up
Source: PubMed Central journal article supplement (PMC8740691; doi:10.3389/fmed.2021.796676), 2021-12-24
Supplement: Table_7.pdf [file Table_7.pdf]

**Supplementary Table 7.** Comparison of global differences of IgG, IgM, and IgA levels over time in HD patients and controls, according to age groups (data presented in Figure 3).

| <i>p</i> -value† |     | All                   | 27-70y                | 71-96y                |
|------------------|-----|-----------------------|-----------------------|-----------------------|
| Patients         | IgG | 2.2x10 <sup>-16</sup> | 2.2x10 <sup>-16</sup> | 2.2x10 <sup>-16</sup> |
|                  | IgM | 2.2x10 <sup>-16</sup> | 8.5x10 <sup>-13</sup> | 2.2x10 <sup>-16</sup> |
|                  | IgA | 2.2x10 <sup>-16</sup> | 2.2x10 <sup>-16</sup> | 2.2x10 <sup>-16</sup> |
| Controls         | IgG | 2.2x10 <sup>-16</sup> | 2.2x10 <sup>-16</sup> | 2.2x10 <sup>-16</sup> |
|                  | IgM | 9.164e-06             | 2.2x10 <sup>-16</sup> | 0.02799               |
|                  | IgA | 2.2x10 <sup>-16</sup> | 2.2x10 <sup>-16</sup> | 2.2x10 <sup>-16</sup> |

†Quade test was used to test for group differences over time.
