# Supplementary material for: Longitudinal Analysis of Antibody Responses to the mRNA BNT162b2 Vaccine in Patients Undergoing Maintenance Hemodialysis: A 6-Month Follow-Up
Source: PubMed Central journal article supplement (PMC8740691; doi:10.3389/fmed.2021.796676), 2021-12-24
Supplement: Table_8.pdf [file Table_8.pdf]

**Supplementary Table 8.** Anti-spike IgG levels in HD patients, treated or not with immunosuppressors (data presented in Figure 4).

|                                        | Age    | n  | Median [IQR]     |                  |                  |
|----------------------------------------|--------|----|------------------|------------------|------------------|
|                                        |        |    | t0               | t1               | t2               |
| Immuno-suppression                     | 42-63y | 11 | 0.16 [0.13-0.25] | 0.37 [0.19-0.59] | 1.85 [1.27-2.17] |
| No immuno-suppression                  | 42-69y | 50 | 0.23 [0.15-0.34] | 0.78 [0.57-1.21] | 2.11 [1.94-2.26] |
| <i>p</i> -value* (treated vs controls) |        |    | 0.1798           | 0.0127           | 0.0969           |

n, number of individuals with a given event; IQR, interquartile range; t0 – sera collected on day of 1<sup>st</sup> vaccine dose; t1 – sera collected 21 days post-1<sup>st</sup> vaccine dose; t2 – sera collected 42 days post-1<sup>st</sup> vaccine dose.

\*Wilcoxon rank sum test with BH method for *p*-value adjustment was used to compare Ig levels between patients treated or not with immunosuppressors.
