# Supplementary material for: Longitudinal Analysis of Antibody Responses to the mRNA BNT162b2 Vaccine in Patients Undergoing Maintenance Hemodialysis: A 6-Month Follow-Up
Source: PubMed Central journal article supplement (PMC8740691; doi:10.3389/fmed.2021.796676), 2021-12-24
Supplement: Table_9.pdf [file Table_9.pdf]

**Supplementary Table 9.** *p*-values comparing IgG levels over time in HD patients, treated or not with immunosuppressors (Figure 4).

| <i>p</i> -value*      | Time | t0                    | t1                    |
|-----------------------|------|-----------------------|-----------------------|
| Immuno-suppression    | t1   | 0.1014                | -                     |
|                       | t2   | 0.0006                | 0.0048                |
| No immuno-suppression | t1   | 1.9x10 <sup>-12</sup> | -                     |
|                       | t2   | 2.0x10 <sup>-16</sup> | 7.1x10 <sup>-16</sup> |

t0 – sera collected on day of 1<sup>st</sup> vaccine dose; t1 – sera collected 21 days post-1<sup>st</sup> vaccine dose.  
 \*Pairwise Wilcoxon signed-rank test was used to compare Ig levels between time points
