# Supplementary material for: Longitudinal Analysis of Antibody Responses to the mRNA BNT162b2 Vaccine in Patients Undergoing Maintenance Hemodialysis: A 6-Month Follow-Up
Source: PubMed Central journal article supplement (PMC8740691; doi:10.3389/fmed.2021.796676), 2021-12-24
Supplement: Table_10.pdf [file Table_10.pdf]

**Supplementary Table 10.** Positivity, Median and Interquartile range [IQR] for anti-spike IgG, IgM, and IgA (data presented in Figure 6).

|                         | <b>t2</b><br>(N=126) | <b>t3</b><br>(N=126) | <b>t4</b><br>(N=126) | <i>p</i> -value*<br>t2 vs t3 | <i>p</i> -value*<br>t2 vs t4 | <i>p</i> -value*<br>t3 vs t4 |
|-------------------------|----------------------|----------------------|----------------------|------------------------------|------------------------------|------------------------------|
| <b>anti-spike IgG</b>   |                      |                      |                      |                              |                              |                              |
| positive, n (%)         | 116 (92.06)          | 97 (76.98)           | 87 (69.05)           | 0.0017                       | 8.32x10 <sup>-6</sup>        | 0.2015                       |
| ODnorm,<br>median [IQR] | 2.03 [1.69-2.21]     | 1.49 [1.08-1.79]     | 1.28 [0.84-1.58]     | <2x10 <sup>-16</sup>         | <2x10 <sup>-16</sup>         | <2x10 <sup>-16</sup>         |
| <b>anti-spike IgM</b>   |                      |                      |                      |                              |                              |                              |
| positive, n (%)         | 34 (26.98)           | 7 (5.56)             | 5 (3.97)             | 1.365x10 <sup>-5</sup>       | 3.23x10 <sup>-6</sup>        | 0.7674                       |
| ODnorm,<br>median [IQR] | 0.65 [0.43-1.04]     | 0.34 [0.26-0.56]     | 0.36 [0.27-0.54]     | <2x10 <sup>-16</sup>         | <2x10 <sup>-16</sup>         | 0.7500                       |
| <b>anti-spike IgA</b>   |                      |                      |                      |                              |                              |                              |
| positive, n (%)         | 106 (84.13)          | 46 (36.51)           | 42 (33.33)           | 4.55x10 <sup>-14</sup>       | 2.27x10 <sup>-15</sup>       | 0.6918                       |
| ODnorm,<br>median [IQR] | 1.21 [1.08-1.62]     | 0.76 [0.52-1.17]     | 0.78 [0.53-1.08]     | <2x10 <sup>-16</sup>         | <2x10 <sup>-16</sup>         | 0.4100                       |

N, total number of individuals; n, number of individuals with a given event; IQR, interquartile range; t2 – sera collected 42 days post-1<sup>st</sup> vaccine dose; t3 - sera collected ~140 days post-1<sup>st</sup> vaccine dose; t4 - sera collected 180 days post-1<sup>st</sup> vaccine dose. Quade test for differences in anti-spike IgG, IgM, and IgA levels over time,  $p < 2 \times 10^{-16}$ .

\*Statistical tests were applied according to the type of variable (Chi-square for positivity and pairwise Wilcoxon signed-rank test for ODnorm).
