# Supplementary material for: Longitudinal Analysis of Antibody Responses to the mRNA BNT162b2 Vaccine in Patients Undergoing Maintenance Hemodialysis: A 6-Month Follow-Up
Source: PubMed Central journal article supplement (PMC8740691; doi:10.3389/fmed.2021.796676), 2021-12-24
Supplement: Table_11.pdf [file Table_11.pdf]

**Supplementary Table 11.** Comparison of IgG levels between seronegative and seropositive at t4, at indicated time points (data presented in Figure 7A).

| Time | Median [IQR]         |                      | p-value*               |
|------|----------------------|----------------------|------------------------|
|      | Seronegative<br>n=29 | Seropositive<br>n=87 |                        |
| t0   | 0.22 [0.14-0.26]     | 0.22 [0.17-0.36]     | 7.79x10 <sup>-02</sup> |
| t1   | 0.37 [0.24-0.70]     | 0.80 [0.44-1.22]     | 7.03x10 <sup>-04</sup> |
| t2   | 1.79 [1.55-1.99]     | 2.12 [1.89-2.29]     | 2.16x10 <sup>-05</sup> |
| t3   | 0.91 [0.69-1.08]     | 1.71 [1.47-1.87]     | 2.48x10 <sup>-14</sup> |
| t4   | 0.72 [0.55-0.84]     | 1.47 [1.24-1.66]     | 4.49x10 <sup>-15</sup> |

t0 – sera collected on day of 1<sup>st</sup> vaccine dose; t1 – sera collected 21 days post-1<sup>st</sup> vaccine dose; t2 – sera collected 42 days post-1<sup>st</sup> vaccine dose; t3 - sera collected ~140 days post-1<sup>st</sup> vaccine dose; t4 - sera collected 180 days post-1<sup>st</sup> vaccine dose.

\*Wilcoxon rank sum test with BH method for p-value adjustment was used to compare Ig levels between patients treated or not with immunosuppressors.
