# Supplementary material for: Longitudinal Analysis of Antibody Responses to the mRNA BNT162b2 Vaccine in Patients Undergoing Maintenance Hemodialysis: A 6-Month Follow-Up
Source: PubMed Central journal article supplement (PMC8740691; doi:10.3389/fmed.2021.796676), 2021-12-24
Supplement: Table_12.pdf [file Table_12.pdf]

**Supplementary Table 12.** *p*-values comparing IgG levels over time in seronegative and seropositive at t4 and (Figure 7A).

|                      | Time | <i>p</i> -value*       |                        |                        |                        |
|----------------------|------|------------------------|------------------------|------------------------|------------------------|
|                      |      | t0                     | t1                     | t2                     | t3                     |
| Seronegative<br>n=29 | t1   | 3.0x10 <sup>-05</sup>  | -                      | -                      | -                      |
|                      | t2   | 6.2x10 <sup>-09</sup>  | 6.2x10 <sup>-09</sup>  | -                      | -                      |
|                      | t3   | 6.2x10 <sup>-09</sup>  | 8.6x10 <sup>-05</sup>  | 6.2x10 <sup>-09</sup>  | -                      |
|                      | t4   | 6.2x10 <sup>-09</sup>  | 0.0035                 | 6.2x10 <sup>-09</sup>  | 2.3x10 <sup>-05</sup>  |
| Seropositive<br>n=87 | t1   | 2.4x10 <sup>-15</sup>  | -                      | -                      | -                      |
|                      | t2   | 1.4x10 <sup>-15</sup>  | 1.24x10 <sup>-15</sup> | -                      | -                      |
|                      | t3   | 1.24x10 <sup>-15</sup> | 1.94x10 <sup>-15</sup> | 6.34x10 <sup>-15</sup> | -                      |
|                      | t4   | 1.24x10 <sup>-15</sup> | 2.64x10 <sup>-14</sup> | 1.24x10 <sup>-15</sup> | 1.94x10 <sup>-15</sup> |

t0 – sera collected on day of 1<sup>st</sup> vaccine dose; t1 – sera collected 21 days post-1<sup>st</sup> vaccine dose; t2 – sera collected 42 days post-1<sup>st</sup> vaccine dose; t3 - sera collected ~140 days post-1<sup>st</sup> vaccine dose; t4 - sera collected 180 days post-1<sup>st</sup> vaccine dose.

\*Pairwise Wilcoxon signed-rank test was used to compare Ig levels between time points. Quade test for differences in anti-spike IgG levels over time,  $p < 2 \times 10^{-16}$ .
