# Supplementary material for: Longitudinal Analysis of Antibody Responses to the mRNA BNT162b2 Vaccine in Patients Undergoing Maintenance Hemodialysis: A 6-Month Follow-Up
Source: PubMed Central journal article supplement (PMC8740691; doi:10.3389/fmed.2021.796676), 2021-12-24
Supplement: Table_13.pdf [file Table_13.pdf]

**Supplementary Table 13. Spearman correlation analysis of anti-spike IgG levels at t4 versus IgG levels at earlier collection time points (data for t4 vs t1 presented in Figure 7B).**

| Correlation analysis (n=116) |           |                         |          |
|------------------------------|-----------|-------------------------|----------|
| IgG OD norm                  | Age Group | <i>p</i> -value*        | $\rho$ † |
| t4 vs t1                     | All       | $5.623 \times 10^{-12}$ | 0.5845   |
|                              | 27-70     | $7.993 \times 10^{-07}$ | 0.6213   |
|                              | 71-93     | $2.193 \times 10^{-05}$ | 0.5214   |
| t4 vs t2                     | All       | $5.749 \times 10^{-09}$ | 0.5082   |
|                              | 27-70     | $3.593 \times 10^{-05}$ | 0.5334   |
|                              | 71-93     | $8.605 \times 10^{-05}$ | 0.4866   |
| t4 vs t3                     | All       | $<2.2 \times 10^{-16}$  | 0.9426   |
|                              | 27-70     | $<2.2 \times 10^{-16}$  | 0.9331   |
|                              | 71-93     | $<2.2 \times 10^{-16}$  | 0.9444   |

t0 – sera collected on day of 1<sup>st</sup> vaccine dose; t1 – sera collected 21 days post-1<sup>st</sup> vaccine dose; t2 – sera collected 42 days post-1<sup>st</sup> vaccine dose; t3 - sera collected ~140 days post-1<sup>st</sup> vaccine dose; t4 - sera collected 180 days post-1<sup>st</sup> vaccine dose.

\* Spearman correlation *p*-value

† Spearman correlation coefficient
